# Supplementary material for: Gamma radiation-responsive side-chain tellurium-containing polymer for cancer therapy
Source: Royal Society of Chemistry journal article supplement (doi:10.1039/c8qm00321a), 2018-01-01
Supplement: c8qm00321a1.pdf [file c8qm00321a1.pdf]

## Supporting information

# Gamma radiation responsive side-chain tellurium-containing polymer for cancer therapy

Fuqiang Fan<sup>†a,b</sup>, Shiqian Gao<sup>†b,c</sup>, Shaobo Ji<sup>b</sup>, Yu Fu<sup>\*a</sup>, Pengpeng Zhang<sup>\*d</sup> and Huaping Xu<sup>\*b</sup>

<sup>a</sup>College of Sciences, Northeastern University, Shenyang 110819, China.

<sup>b</sup>Key Lab of Organic Optoelectronics & Molecular Engineering, Department of Chemistry, Tsinghua University, Beijing 100084, China.

<sup>c</sup>Tsinghua-Peking Joint Center for Life Sciences, Beijing 100084, China.

<sup>d</sup>Department of Respiratory and Critical Care Medicine, Jinling Hospital, 305 East Zhongshan Road, Nanjing 210002, China.

**Additional Figures:**

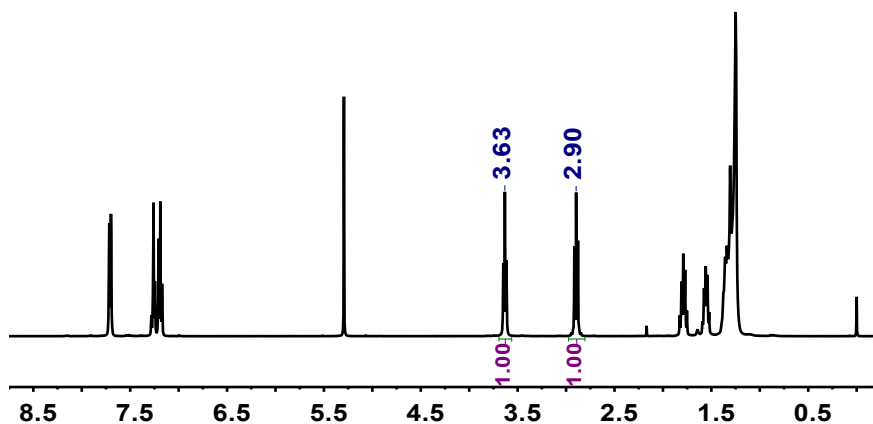

**Figure S1.**  $^1\text{H}$  NMR spectrum of Ar-Te-OH (400 MHz,  $\text{CDCl}_3$ , 298K).

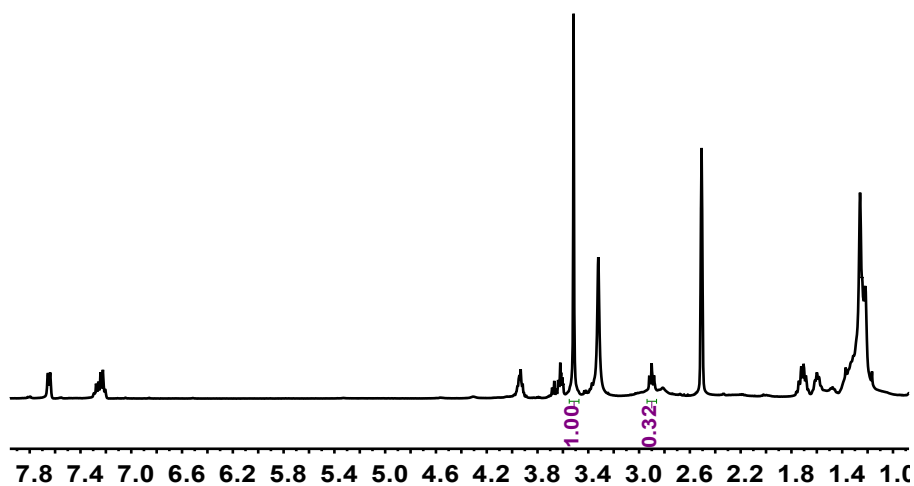

**Figure S2.**  $^1\text{H}$  NMR spectrum of PEG-PAA-Te (400 MHz,  $\text{DMSO-D}_6$ , 298K).

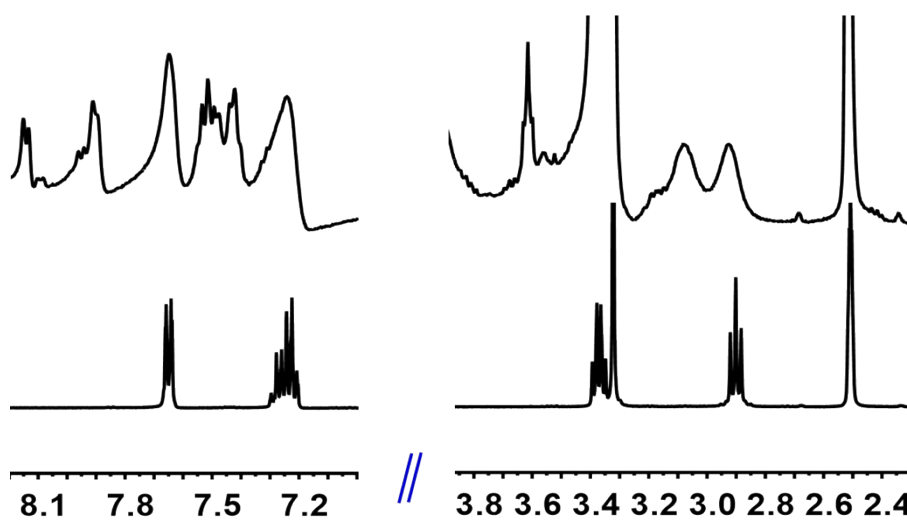

**Figure S3.**  $^1\text{H}$  NMR spectrum of the Ar-Te-OH coordination with CDDP (400 MHz,  $\text{DMSO-D}_6$ , 298K). The peak 3.15 ppm was the  $\alpha$  proton of tellurium after the coordination with CDDP

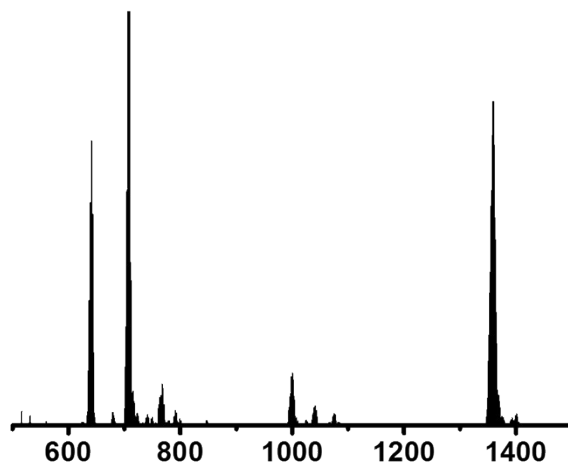

**Figure S4.** ESI-Mass signals for the coordination complexes.

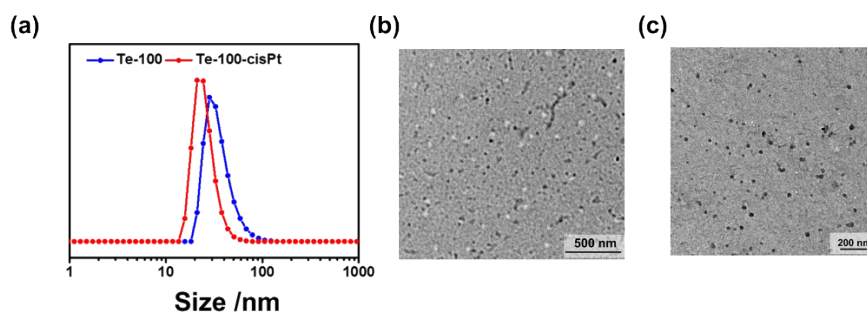

**Figure S5.** Characterization of the PEG-*b*-PAA-*g*-Te nanoparticles. (a) The size of the NPs before and after they were coordinated with CDDP, as measured by DLS. TEM images of (b) NPs-Te and (c) NPs-Te-Pt.

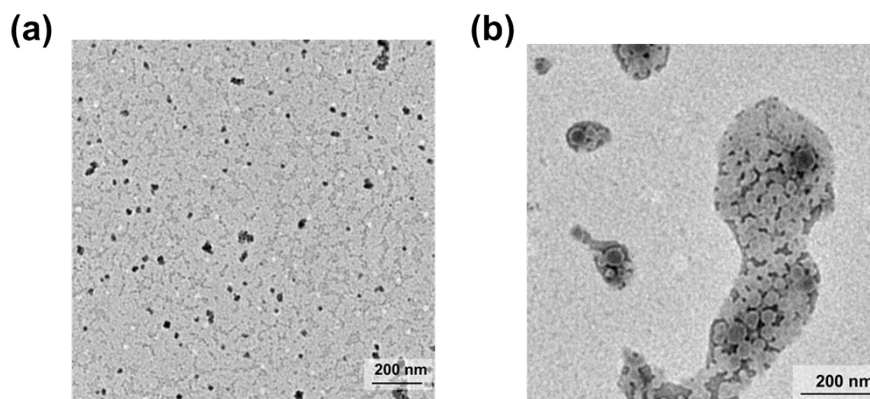

**Figure S6.** TEM images of 0.5 mg/mL PEG-*b*-PAA-*g*-Te/Pt after 2 Gy radiation (a) and 5 Gy radiation (b).

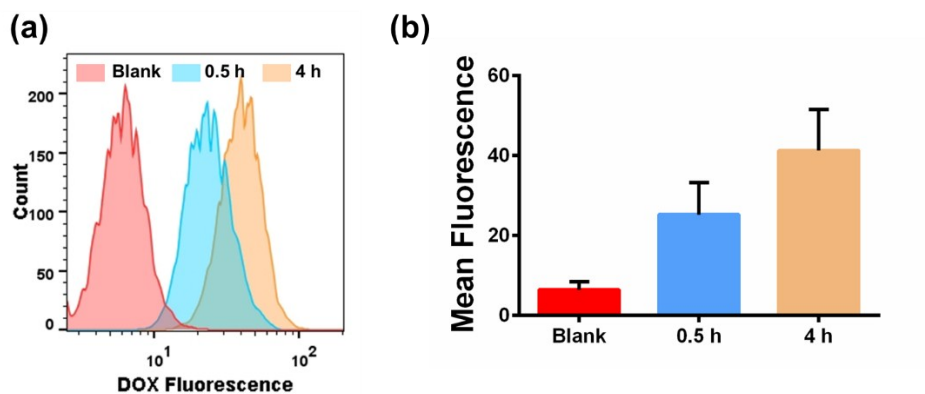

**Figure S7.** Cellular uptake. Flow cytometry images (a) and statistics (b) of the MDA-MB-231 cells treated with PEG-*b*-PAA-*g*-Te/Dox at different time points.

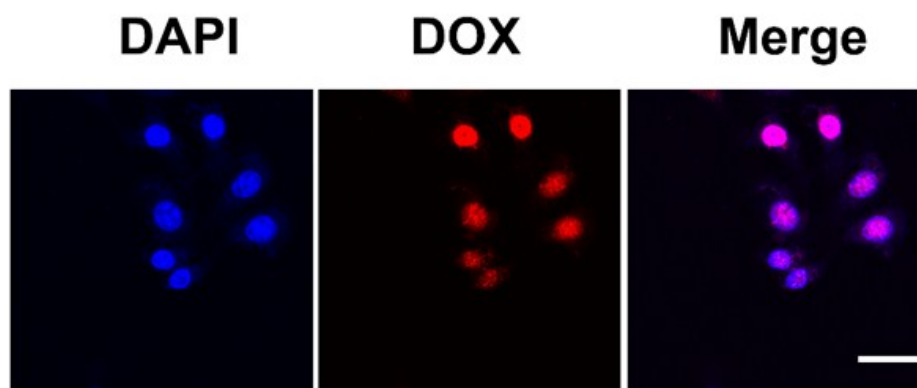

**Figure S8.** The confocal microscopic images of MDA-MB-231 cells treated with free Dox.

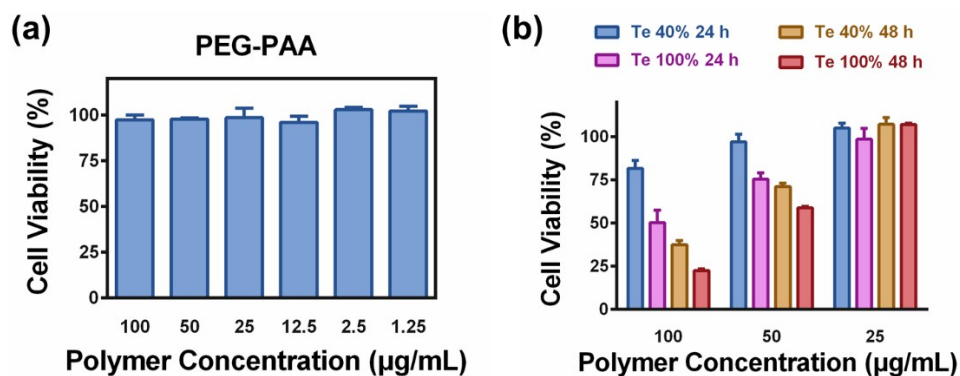

**Figure S9.** Cytotoxicity of the different nanoparticles in vitro. (a) Different concentrations of PEG-*b*-PAA. (b) Different grafting ratios of PEG-*b*-PAA-*g*-Te.

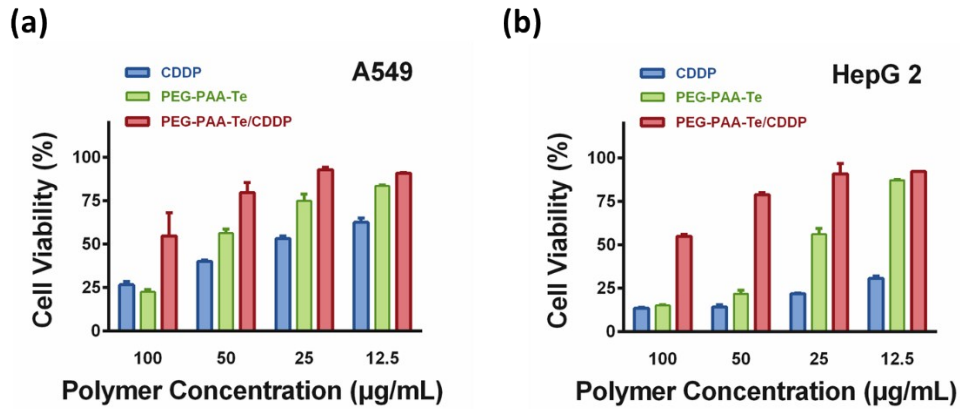

**Figure S10.** Cytotoxicity of the nanoparticles on different cells *in vitro*. (a) A549 cell. (b) HepG2 cells.

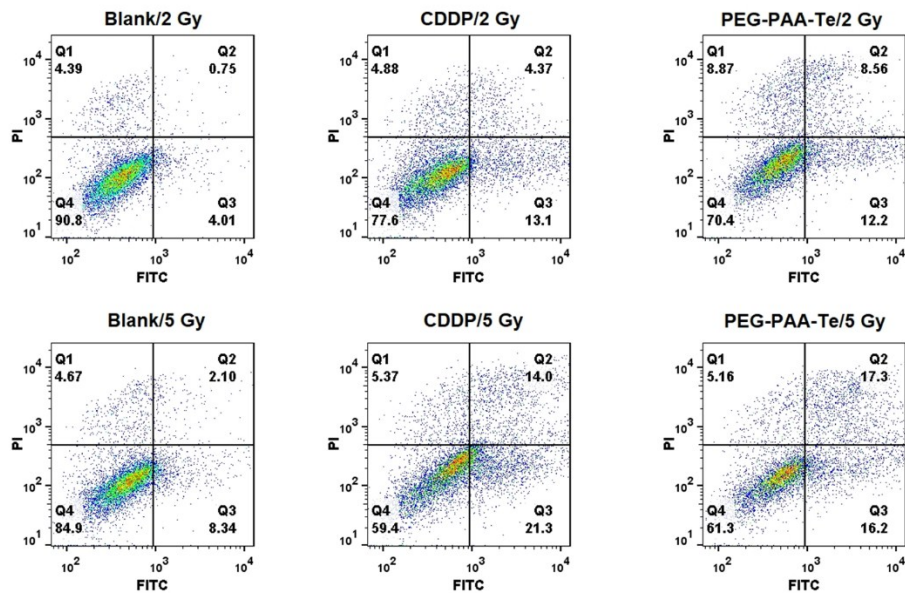

**Figure S11.** Flow cytometry measured the cell apoptosis. The sum of the Q<sub>2</sub> and Q<sub>3</sub> areas indicated the cell apoptosis.

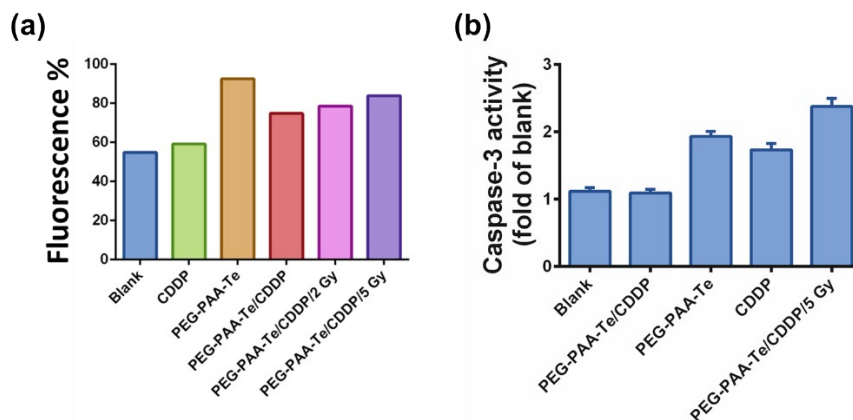

**Figure S12.** Flow cytometry statistics (a) of the MDA-MB-231 cells treated with the different nanoparticles. (b) Caspase-3 activity after treatment with 100 µg/mL nanoparticles.
